1 **Running head:** Meta-analysis of amphibian-Bd research

2

3 **Title:** A meta-analysis reveals temperature, dose, life stage, and taxonomy influence host  
4 susceptibility to a fungal parasite

5

6 **Authors:** Erin L. Sauer<sup>1,2\*</sup>, Jeremy M. Cohen<sup>1,2</sup>, Marc J. Lajeunesse<sup>1</sup>, Taegan A. McMahon<sup>3</sup>,  
7 David J. Civitello<sup>4§</sup>, Sarah A. Knutie<sup>5§</sup>, Karena Nguyen<sup>1§</sup>, Elizabeth A. Roznik<sup>6§</sup>, Brittany F.  
8 Sears<sup>7§</sup>, Scott Bessler<sup>1◇</sup>, Bryan K. Delius<sup>1◇</sup>, Neal Halstead<sup>8◇</sup>, Nicole Ortega<sup>1◇</sup>, Matthew D.  
9 Venesky<sup>9◇</sup>, Suzanne Young<sup>10◇</sup>, and Jason R. Rohr<sup>1,11</sup>

10

11 **Affiliations:**

12 <sup>1</sup>Department of Integrative Biology, University of South Florida, Tampa, FL.

13 <sup>2</sup>Department of Forest and Wildlife Ecology, University of Wisconsin, Madison, WI.

14 <sup>3</sup>Department of Biology, University of Tampa, Tampa, FL.

15 <sup>4</sup>Department of Biology, Emory University, Atlanta, GA.

16 <sup>5</sup>Department of Ecology and Evolutionary Biology, University of Connecticut, Storrs, CT

17 <sup>6</sup>Department of Research and Conservation, Memphis Zoo, Memphis, TN.

18 <sup>7</sup>BioScience Writers, Houston, TX.

19 <sup>8</sup>Wildlands Conservation, Tampa, FL.

20 <sup>9</sup>Department of Biology, Allegheny College, Meadville, PA.

21 <sup>10</sup>Environmental Engineering Institute, Ecole polytechnique fédérale de Lausanne (EPFL),  
22 Lausanne, Switzerland.

23 <sup>11</sup>Department of Biological Science, University of Notre Dame, South Bend, IN.

24 \*Correspondence to: erinsauer10@gmail.com

25 §◇ These authors contributed equally and are listed alphabetically

26 **Keywords:** Meta-analysis, *Batrachochytrium dendrobatidis*, amphibian declines, experimental

27 design, disease ecology, chytridiomycosis, thermal mismatches, dose response, life stage effects

28

29 **Abstract:** Complex ecological relationships, such as host-parasite interactions, are often  
30 modeled with laboratory experiments. However, some experimental laboratory conditions, such  
31 as temperature or infection dose, are regularly chosen based on convenience or convention and it  
32 is unclear how these decisions systematically affect experimental outcomes. Here, we conducted  
33 a meta-analysis of 58 laboratory studies that exposed amphibians to the pathogenic fungus  
34 *Batrachochytrium dendrobatidis* (Bd) to better understand how laboratory temperature, host life  
35 stage, infection dose, and host species affect host mortality. We found that host mortality was  
36 driven by thermal mismatches: hosts native to cooler environments experienced greater Bd-  
37 induced mortality at relatively warm experimental temperatures and vice versa. We also found  
38 that Bd dose positively predicted Bd-induced host mortality and that the superfamilies  
39 Bufonoidea and Hyloidea were especially susceptible to Bd. Finally, the effect of Bd on host  
40 mortality varied across host life stages, with larval amphibians experiencing lower risk of Bd-  
41 induced mortality than adults or metamorphs. Metamorphs were especially susceptible and  
42 experienced mortality when inoculated with much smaller Bd doses than the average dose used  
43 by researchers. Our results suggest that when designing experiments on species interactions,  
44 researchers should carefully consider the experimental temperature, and inoculum dose, and life  
45 stage and taxonomy of the host species.

## 46 **Introduction**

47 Laboratory experiments are a common tool used in ecology to better understand complex  
48 species interactions. However, experimental laboratory conditions are often chosen based on  
49 convenience or convention, which could intentionally or unintentionally affect experimental  
50 outcomes (Hairston 1989). For example, experiments on temperature-dependent organisms are  
51 often conducted at a constant temperature with no justification as to why that temperature was

52 chosen. Furthermore, researchers might select convenient or conventional populations, strains,  
53 and densities of organisms to study (Hairston 1989). The consequences of these common  
54 decisions for the outcomes of species interaction studies are often not well understood. However,  
55 methodological choices are likely to bias extrapolations of experimental results to the population  
56 level under natural conditions, potentially affecting management decisions. Disentangling these  
57 potential confounding effects of experimental design on host-parasite interactions is therefore  
58 critical, especially because of the recent rise in emerging infectious diseases that are causing  
59 global declines in biodiversity (Goulson et al. 2015, Scheele et al. 2019). Thus, researchers must  
60 understand how test conditions intentionally or unintentionally alter experimental outcomes and  
61 affect host-parasite interactions and disease progression, especially for systems in which  
62 experimental outcomes can inform resource management and conservation.

63         The pathogenic fungus *Batrachochytrium dendrobatidis* (Bd) has been associated with  
64 hundreds of amphibian declines worldwide over the past 40 years (Scheele et al. 2019).  
65 Consequently, Bd has been the focus of thousands of studies and surveys in recent decades,  
66 many of which have been used to inform conservation efforts (Skerratt et al. 2007, Rohr and  
67 Raffel 2010, Converse et al. 2017). Bd infects keratinized mouthparts of larval amphibians and  
68 keratinized skin on the whole body of post-metamorphic amphibians, degrading the epithelial  
69 layer and causing the lethal disease chytridiomycosis (Berger et al. 1998, Pessier et al. 1999,  
70 Grogan et al. 2018). Effects of the pathogen on wild host populations vary greatly, with some  
71 species experiencing declines, extirpations, or even total extinction, and others experiencing few  
72 to no negative impacts (Venesky et al. 2014, Berger et al. 2016, Scheele et al. 2019).  
73 Heterogeneity in virulence, tolerance, and resistance among species has led to conflicting

74 findings and much debate about mechanisms that might be driving these apparent differences in  
75 mortality risk among host populations (Fisher et al. 2009).

76 Many factors affect Bd-host interactions (Blaustein et al. 2018), including host behavior  
77 (Sauer et al. 2018), body size (Carey et al. 2006), Bd isolate (O'Hanlon et al. 2018), zoospore  
78 dose (Carey et al. 2006), temperature (Cohen et al. 2017), host taxon (Gervasi et al. 2017), and  
79 life stage (McMahon and Rohr 2015). However, the influences of these factors on Bd-host  
80 interactions are often not straightforward and not well-understood. For example, many studies  
81 have independently concluded that warm temperatures are positively associated with Bd  
82 prevalence and host mortality (e.g., Pounds et al. 2006, Bosch et al. 2007), while many others  
83 have found associations between Bd outbreaks and cold temperatures or seasons (e.g., Retallick  
84 et al. 2004, Kriger and Hero 2007). Recently, a more context-dependent hypothesis, the thermal  
85 mismatch hypothesis, was proposed to explain these inconsistencies. This hypothesis suggests  
86 that host species adapted to warmer climates should be more susceptible to disease at relatively  
87 cool temperatures, whereas cool-adapted host species should be most susceptible during  
88 unusually warm periods (Appendix S1: Fig. S1, Cohen et al. 2017). This hypothesis assumes that  
89 smaller-bodied pathogens generally have wider thermal breadths than their larger-bodied hosts  
90 (Rohr et al. 2018) and are limited by extremes, which allows pathogens to outperform their hosts  
91 under abnormal, but not extreme conditions (Cohen et al. 2017). The thermal mismatch  
92 hypothesis is supported by multiple laboratory experiments and global-scale analyses of data  
93 collected in the field which show warm- and cool-adapted hosts experience faster Bd growth and  
94 greater Bd prevalence at cool and warm temperatures, respectively (Cohen et al. 2017, Sauer et  
95 al. 2018, Cohen et al. 2019a, Cohen et al. 2019b). However, experimental evidence for this

96 hypothesis is restricted to only three amphibian host species (Cohen et al. 2017, Sauer et al.  
97 2018).

98           Conversely, more is understood about the effects of life stage, zoospore dose, and host  
99 taxa on Bd-amphibian interactions than the effects of temperature, but the generality of these  
100 effects has not been explored in detail. For example, dose (number of infective Bd zoospores a  
101 host is exposed to) typically increases host mortality risk (Carey et al. 2006). However, it is  
102 unclear which doses are generally needed to produce mortality across life stages, information  
103 that would be useful for researchers examining sub-lethal effects of Bd. Finally, many  
104 researchers select local, easily-collected study species for experiments out of convenience, but  
105 species vary greatly in their susceptibility to Bd (Gervasi et al. 2017). Field evidence has  
106 suggested that globally, tropical Bufonidae and Hyloidea species have undergone more severe  
107 declines than other groups of amphibians (Scheele et al. 2019). However, mortality risk does not  
108 always translate to extinction risk. For example, a cross-taxon study of twenty Anuran species in  
109 North America found that Bufonidae species were more susceptible to Bd than Ranidae or  
110 Hylidae species despite a greater number of documented Bd-associated declines among Ranidae  
111 and Hylidae in North America (Gervasi et al. 2017, Scheele et al. 2019). Thus, a global synthesis  
112 of existing data is needed to determine which amphibian taxa have the greatest risk of mortality  
113 following Bd exposure independent of factors that might increase extinction risk in the wild (e.g.  
114 local climate or restricted range sizes).

115           Understanding how different experimental factors might unexpectedly affect Bd-induced  
116 amphibian mortality would allow researchers to better design experiments, target the intended  
117 research question, and appropriately apply experimental findings to conservation efforts. Here,  
118 we use a meta-analysis of 58 experimental studies conducted in the amphibian-Bd system to

119 assess how common experimental factors affect Bd-induced mortality risk in amphibian hosts.  
120 First, we asked if amphibian host susceptibility to Bd is dependent on temperature, predicting  
121 that mortality increases when there is a greater mismatch between laboratory temperature and the  
122 mean temperature to which the host is adapted. Second, we examined how host life stage (larva,  
123 metamorph, or adult) influences susceptibility to Bd, expecting that metamorphs and adults  
124 would be more susceptible to Bd than larvae because more of their skin is keratinized. Third, we  
125 asked whether Bd dose affects host mortality, predicting that mortality risk increases with Bd  
126 dose and that metamorphs are at greatest risk of Bd-induced mortality at relatively low doses.  
127 Finally, we examined how host taxonomy influences susceptibility to Bd, expecting that  
128 Bufonidae and Hyloidea species would be most susceptible to Bd given the severe Bd-associated  
129 declines in those groups. To accomplish these four goals, we searched the published literature for  
130 amphibian-Bd laboratory studies and modeled effects of thermal mismatches, life stage, and dose  
131 on Bd-induced mortality.

## 132 **Materials and Methods**

### 133 *Data collection*

134 Our goal was to synthesize all experimental studies that compared amphibian hosts  
135 experimentally infected with Bd in the laboratory to unexposed controls. To accomplish this, we  
136 conducted a meta-analysis, which allowed us to standardize and combine results across multiple  
137 experiments to draw a broader conclusion than could be typically drawn from any one  
138 experiment. We located studies in Web of Science by searching for the term “*Batrachochytrium*  
139 *dendrobatidis*” in October 2016, producing 1,403 results. We included laboratory studies  
140 meeting all of the following conditions: 1) at least one Bd-exposed treatment paired with an  
141 unexposed control group (we did not consider treatments that exposed hosts to additional

142 parasites [e.g. co-infection] or pesticides and other compounds), 2) treatments held at a constant  
143 laboratory temperature, 3) hosts were either wild-collected or lab-reared from wild-collected  
144 parents to avoid situations where hosts may have adapted to the climatic conditions of the  
145 captive-breeding facility, 4) treatment and control mortality, sample sizes, and host and Bd  
146 isolate collection location were either available in the manuscript or provided to us by the author  
147 when requested (final count: 58 studies). See Appendix S1 for more details regarding data  
148 collection.

#### 149 *Effect sizes*

150 In meta-analyses, effect sizes must be calculated to provide a standardized measure of an  
151 effect across studies (Borenstein et al. 2011). Because mortality data are binary, we calculated  
152 log odds ratios to assess the odds of mortality in the Bd-exposed animals relative to the control  
153 animals (Cox 2018), using the following equation:

$$154 \quad \ln OR = \ln \left( \frac{(D_t + Y)/(A_t + Y)}{(D_c + Y)/(A_c + Y)} \right) \quad \text{Eqn. 1}$$

155 where  $D_t$  is the number of treatment (i.e. Bd-exposed) animals that died,  $A_t$  is the number of  
156 treatment animals that survived,  $D_c$  is the number of control (i.e. sham-exposed) animals that  
157 died,  $A_c$  is the number of control animals that survived, and  $Y$  ( $Y = 1/2$ ) is a Yate's continuity  
158 correction to avoid error in our effect sizes resulting from dividing by zero (Yates 1934). Yate's  
159 continuity correction ( $Y$ ) was only added to effect sizes and variance equations where an error  
160 from dividing by zero would have occurred; all other effect sizes and variances were calculated  
161 using the same log odds ratio formula but with  $Y$  omitted (Sweeting et al. 2004). When  
162 conducting analyses, odds ratios must be natural log-transformed to ensure that studies with  
163 equal but opposite effects have odds ratios that differ from zero by the same magnitude but in  
164 opposite directions (Borenstein et al. 2011). Variance for each effect size was calculated as:

165 
$$Var_{lnOR} = \frac{1}{(D_t+Y)} + \frac{1}{(A_t+Y)} + \frac{1}{(D_c+Y)} + \frac{1}{(A_c+Y)} \quad \text{Eqn. 2}$$

166 A log odds ratio significantly greater than zero represents greater mortality in the  
167 treatment group than in the control, whereas a log odds ratio with 95% confidence intervals that  
168 overlap with zero represents a failure to reject the null hypothesis that Bd exposure has no effect  
169 on host survival. We calculated log odds ratios from mortality reported at the end of each  
170 experiment, regardless of experimental duration. However, mortality tends to increase over time  
171 and studies varied in their duration. We were unable to conduct a time series analysis without  
172 losing a large portion of studies, as many did not report survival over time. Therefore, we  
173 controlled for inconsistencies in experimental length by including duration of experiment as a  
174 moderator in our model (see *Statistical analysis* section).

175 *Statistical analysis*

176 All analyses were conducted in R 3.5.1 (2017). We analyzed the data using a mixed-  
177 effects meta-analysis (*metafor* package, *rma.mv* function (2010)), described with the following  
178 regression equation:

179 
$$y_i \sim \beta_{1i}t_{1i} + \beta_{2i}t_{2i} + \beta_{3i}t_{1i}t_{2i} + \beta_3d_i + \beta_4l_i + \beta_5z_i + \beta_6F_i + \gamma_1e_i + \gamma_2b_i + \gamma_3S_i + v_i \quad \text{Eqn.}$$

180 3

181 Where  $y_i$  denotes log odds ratios and  $v_i$  denotes log odds ratio variance for the  $i^{\text{th}}$  effect size. Our  
182 primary hypotheses concerned the relationship between experimental conditions and Bd  
183 infection outcome, not simply the main effect of Bd on host mortality. Therefore, our models  
184 included the following multiple moderators. First, thermal mismatch effect ( $t_1 * t_2$ ), was  
185 represented by an interaction between 50-year mean temperature at the host's collection site  
186 extracted from WorldClim ( $t_1$ ; assumed host-adapted temperature) and the laboratory  
187 temperature ( $t_2$ ) at which the experiment was conducted. We also considered using mean annual



188 minimum and maximum temperatures as the expected temperature to which hosts have adapted  
189 and have included those analyses as well as further explanation for our use of long-term annual  
190 mean temperature as assumed host-adapted temperature in Appendix S1 (see Appendix S1: Data  
191 collection & Figure S1). Support for the thermal mismatch hypothesis is represented by a  
192 negative interaction between these two factors, where cool- and warm-adapted hosts experience  
193 the greatest Bd-induced mortality at warm and cool laboratory temperatures, respectively. We  
194 also included moderators for effects of experimental duration (*d*), life stage (*l*; three-level  
195 categorical variable: larvae, metamorph, adult), log<sub>10</sub>-transformed Bd zoospore dose (*z*), and  
196 taxonomic group (*F*; six-level categorical variable). In order to explore differences in  
197 susceptibility among host taxa, species were consolidated into taxonomic groups with larger  
198 sample sizes. Thus, taxonomic groups represent either a superfamily (Bufonoidea, Hyloidea,  
199 Ranoidea, and Pelobatoidea), or a suborder (Salamandroidea and Archaeobatrachia). See  
200 Appendix S1 and Appendix S1: Table S1 for summary information and full list of host species  
201 included in the meta-analysis.

202       To avoid bias and risk of type I error, we accounted for between-study random effects (*e*)  
203 as well as non-independence among Bd isolates by including Bd isolate (*b*) and host species (*S*)  
204 as a random intercept in our models (Borenstein et al. 2011, Civitello et al. 2015). Due to the  
205 complex non-independence among effect sizes within a study (e.g. some studies had multiple  
206 effect sizes), we did not use funnel plots or rank correlation tests to assess publication bias (Lau  
207 et al. 2006, Civitello et al. 2015). To create the partial residual plots, which allowed us to  
208 visualize the main effects and interactions in our model (Figs. 2, 3, & 4) while controlling for  
209 other covariates in the model, we created an identical meta-analytic model using a Bayesian  
210 linear mixed-effects package (*blme* package, *blmer* function (2013); see Appendix S1 for more

211 details) then generated plots using the *visreg* package (Breheny and Burchett 2013). The  
212 coefficients and error estimates generated from the *blme* model were identical to the results  
213 generated by the *metafor* model (see Appendix S1: Table S2 for comparison). We used this  
214 approach because visualization tools for mixed-effects meta-analytic models in *metafor* are  
215 currently limited. We report summary statistics and *p*-values from our *metafor* model summary  
216 because *metafor* is explicitly intended to be used for meta-analysis and thus reports the  
217 appropriate summary statistics, *p*-values, and confidence intervals while *blme* does not.

## 218 **Results**

219 Our literature search yielded 205 effect sizes from 58 studies and included 47 amphibian  
220 species from 11 families. Experiments used a total of 45 unique Bd isolates (DataS1: Database  
221 S1). Host species were collected from North and South America, Europe, and Oceania (Fig. 1).  
222 Surprisingly, there were no studies that met our inclusion criteria from the Middle East, Asia, or  
223 Africa (Fig. 1).

224 When controlling for among-study variance, Bd isolate, host species, and experimental  
225 duration, we found a negative interaction between host-adapted temperature and laboratory  
226 temperature (thermal mismatch effect) ( $z = -2.75$   $p < 0.01$ ; Table 1 & Fig. 2); cool-adapted hosts  
227 experienced the greatest mortality relative to controls at warm laboratory temperatures and  
228 warm-adapted hosts experienced the highest mortality relative to controls at cool laboratory  
229 temperatures (Table 1 & Fig. 2).

230 Overall, Bd-exposed amphibians experienced higher mortality relative to controls (lnOR  
231 =  $1.56 \pm 0.65$  95% CI), but the magnitude of the effect of Bd exposure on Bd-related mortality  
232 varied depending on host life stage (Table 1 & Fig. 3). Hosts exposed to Bd as metamorphs  
233 experienced the highest odds of mortality (lnOR =  $2.48 \pm 0.38$  95% CI;  $k = 87$ ), followed by

234 adults ( $\ln\text{OR} = 1.58 \pm 0.52$  95% CI;  $k = 58$ ), whereas larvae had the lowest odds of mortality  
235 ( $\ln\text{OR} = 0.61 \pm 0.45$  95% CI;  $k = 60$ ). Additionally, we found a significant positive relationship  
236 between mortality and Bd dose ( $z = 4.00$   $p < 0.01$ ; Table 1 & Fig. 3).

237 Finally, we found that some host taxa experienced significantly higher mortality from Bd  
238 than others (Table & Fig. 4). Bufonoidea had the highest mortality ( $\ln\text{OR} = 3.25 \pm 1.18$  95% CI;  
239  $k = 60$ ) followed by Hyloidea ( $\ln\text{OR} = 2.65 \pm 1.78$  95% CI;  $k = 63$ ) and then Ranoidea ( $\ln\text{OR} =$   
240  $1.34 \pm 1.23$  95% CI;  $k = 47$ ). Bd exposure did not significantly increase mortality for amphibians  
241 belonging to Salamandroidea ( $\ln\text{OR} = 0.80 \pm 1.29$  95% CI;  $k = 31$ ). The number of effect sizes  
242 for Scaphiopodidae ( $k = 3$ ) and Leiopelmatidae ( $k = 1$ ) species were minimal so, we did not  
243 attempt to interpret those results.

## 244 **Discussion**

245 Species interactions can be sensitive to environmental conditions. Therefore, differences  
246 in laboratory and field conditions can reduce the transferability of empirical insights to  
247 management decisions. Here, we synthesized the effects of laboratory conditions that are easily  
248 manipulated by experimenters, such as temperature, study organism, developmental stage, and  
249 exposure dose. Our literature search highlighted a gap in laboratory studies of hosts and Bd  
250 isolates from the Middle East, Asia, and Africa (Fig. 1). Additionally, we found support for the  
251 thermal mismatch hypothesis: hosts from cooler climates were more susceptible to Bd at  
252 relatively warm lab temperatures, and vice versa (Table 1 & Fig. 2). Our data also show an  
253 overall positive effect of Bd exposure on mortality relative to controls (Table 1 & Fig. 3). In  
254 addition, we found that the strength of the effect of Bd exposure on mortality was dependent  
255 upon host life stage (Table 1 & Fig. 3) and host taxa (Table 1 & Fig. 4). Finally, we showed that

256 Bd zoospore dose is positively related with mortality relative to controls, suggesting higher doses  
257 result in greater host mortality (Table 1 & Fig. 3).

258 Our literature search yielded a high number of effect sizes ( $k = 205$ ) and included 47  
259 amphibian species from 11 families as well as a 45 unique Bd isolates. However, we detected a  
260 geographic bias in the collection location of study organisms; the vast majority of hosts and Bd  
261 isolates were from North America and Europe. Less than 10% of our effect sizes represented  
262 host species collected from Central and South America or Oceania, and we did not find any  
263 effect sizes from Asia or Africa because no studies from these regions met our inclusion criteria.  
264 The distribution of amphibian study species matches up poorly with global amphibian diversity,  
265 which is higher in South America, Africa, and Asia than in North America or Europe (IUCN  
266 2018). Because we were testing the thermal mismatch hypothesis, we did not include studies  
267 using hosts that were captive-bred beyond one generation in our study because: 1) hosts might  
268 have adapted to laboratory temperature, and 2) many studies lacked precise collection locations.  
269 This selection method excluded many studies from Oceania and Central America that used  
270 captive-bred imperiled or wild-extinct species out of necessity (Scheele et al. 2019).  
271 Furthermore, we were unable to find any studies that tested wild-collected or captive-bred Asian  
272 or African host species or Bd isolates that met our inclusion criteria. Future Bd research should  
273 consider laboratory experiments on species from these highly neglected areas, because of the  
274 strong genetic support for the recent emergence of Bd from northeastern Asia as well as the  
275 apparent lack of Bd-contributed declines in the region (O'Hanlon et al. 2018, Scheele et al.  
276 2019).

277 Our meta-analysis supported the thermal mismatch hypothesis (Table 1 & Fig. 2). Cool-  
278 adapted hosts had the highest Bd-induced mortality at warm temperatures and warm-adapted

279 hosts had the highest mortality at cool temperatures. Previous support for this hypothesis is based  
280 primarily on observations in the field and only three species studied in the laboratory (Cohen et  
281 al. 2017, Sauer et al. 2018, Cohen et al. 2019a, Cohen et al. 2019b), so our study demonstrates  
282 that these patterns also hold under controlled conditions for a broader range of species. Together,  
283 results from field and laboratory studies suggest that predicted increases in environmental  
284 temperatures caused by climate change might place cool-adapted species at greater risk of  
285 disease-related declines than warm-adapted species (Cohen et al. 2017, Sauer et al. 2018, Cohen  
286 et al. 2019a, Cohen et al. 2019b). Our results are unlikely to be driven by experiments that were  
287 purposely conducted at extreme temperatures because only five of the 58 studies included in this  
288 analysis manipulated environmental temperature. The vast majority of studies (49 of the 58  
289 included in this analysis) simply conducted their experiments at a constant temperature without  
290 providing any justification for choosing that temperature. Researchers might be inadvertently  
291 impacting Bd growth and host mortality by conducting their experiments at temperatures that  
292 differ from the temperatures to which the host is adapted, potentially increasing host stress  
293 (Raffel et al. 2006). Outside of the mounting evidence for the thermal mismatch hypothesis in  
294 the Bd-amphibian system, there is a large body of research showing that environmental  
295 temperatures greatly impact experimental outcomes in this system as well as other amphibian-  
296 disease systems (Rojas et al. 2005, Paull et al. 2012, Brand et al. 2016). Researchers should  
297 carefully consider how experimental temperatures and host thermal preferences and tolerances  
298 impact the results and management applicability of conclusions drawn from laboratory  
299 experiments (Stevenson et al. 2014). Where possible, we encourage researchers to select  
300 temperatures that are ecologically relevant for their specific host-pathogen system.

301 As expected, we found an overall positive effect of Bd on host mortality relative to  
302 controls (Table 1 & Fig. 3) and the average minimum Bd dose needed to find an effect of Bd on  
303 host mortality varied across host life stage (Fig. 3). Amphibians exposed as metamorphs were  
304 more likely to experience mortality after Bd exposure than the larval or adult stages.  
305 Metamorphosis is energetically costly and there are likely trade-offs occurring between  
306 morphological development and the immunological function (Rollins-Smith 1998, Warne et al.  
307 2011), which could make metamorphic amphibians more susceptible to Bd-induced mortality  
308 than larvae or adults. Larvae, while still susceptible to Bd, were less susceptible to Bd than  
309 metamorphs or adults (Table 1 & Fig. 3). Our review of the literature revealed that researchers  
310 tend to expose amphibians to similar doses of Bd, despite differences in susceptibility across life  
311 stages (mean  $\log_{10}$  zoospore dose: larvae =  $5.42 \pm 0.21$  SE; metamorphs =  $5.07 \pm 0.17$  SE; adults  
312 =  $5.95 \pm 0.13$  SE; Fig. 1b). Using lower Bd doses, when possible, may improve the ability of  
313 researchers to detect differences among treatment groups by preventing rapid death in all  
314 treatments due to heavy Bd infection (Carey et al. 2006). This is particularly true for  
315 metamorphic amphibians, which are on average dosed with 1000 times more zoospores than  
316 needed to find an effect on mortality (Fig. 1 & 3). Additionally, researchers interested in sub-  
317 lethal effects of Bd on amphibians might consider running experiments using larval or adult  
318 amphibians and/or using very low Bd zoospore doses (approximately  $< 10^2$  total zoospores; Fig.  
319 1).

320 Finally, we found that Bufonoidea and Hyloidea species had the highest mortality risk,  
321 followed by Ranoidea species (Table 1 & Fig. 4). We were not able to detect a significant effect  
322 of Bd on Salamandroidea (Table 1 & Fig. 4), which supports field evidence that Salamandroidea  
323 species may be less susceptible to Bd than anurans (Bancroft et al. 2011). However, our analysis

324 does not incorporate studies conducted with *Batrachochytrium salamandrivorans*, which has  
325 been associated with declines of salamander populations in Europe (Stegen et al. 2017). Our  
326 results are consistent with the severe risk of Bd-associated declines observed in tropical  
327 Bufonoidea and Hyloidea species (Scheele et al. 2019). Interestingly, all Bufonoidea species in  
328 our analysis are native to temperate regions and only one has been associated with declines,  
329 while most declining Bufonoidea are tropical. Thus, other factors such as local climate, thermal  
330 and hydric preferences, and small range sizes may be interacting with high host susceptibility to  
331 result in population declines in Bufonoidea. Conversely, there were many tropical Hyloidea  
332 species in our meta-analysis that have undergone Bd-associated declines or were collected from  
333 areas with severe Bd-associated declines.

334 Carefully designed experiments are especially important for understanding systems of  
335 conservation concern, including the amphibian-Bd system that has been associated with the  
336 decline of >500 amphibian species (Scheele et al. 2019). Additionally, our literature search  
337 highlighted the need for more research on hosts and Bd isolates from outside of Europe and  
338 North America. The regions with highest levels of amphibian declines (Scheele et al. 2019) and  
339 diversity (IUCN 2018) and the longest history of Bd (O'Hanlon et al. 2018) are some of the least  
340 studied regions in the world. Finally, our results are consistent with the thermal mismatch  
341 hypothesis, suggesting that there are context-dependent effects of environmental temperature on  
342 amphibian mortality in this system. This result highlights the need for researchers to carefully  
343 consider the thermal tolerances and optima of their host species before choosing an experimental  
344 temperature to avoid the confounding effect of thermal mismatch. In summary, because of their  
345 ability to alter experimental outcomes, our results suggest that factors such as experimental  
346 temperature and the life stages, densities, populations, and taxa of studied species should be

347 carefully considered when designing species interaction experiments and subsequent  
348 interpretations for conservation and management.

### 349 **Acknowledgments**

350 We thank O. Santiago for assistance assembling citations and standardizing nomenclature and  
351 L.C. Sackett and S. Deban for helpful comments on the manuscript. E.L.S. and J.R.R. conceived  
352 ideas, E.L.S., J.M.C., and T.A.M. oversaw construction of database, all authors extracted data  
353 from the literature to build the dataset, J.M.C. acquired climate data, E.L.S. and M.J.L.  
354 conducted statistical analyses, E.L.S. and J.R.R. wrote the first draft of the manuscript with  
355 comments from M.J.L., J.M.C., T.A.M., S.A.K., D.J.C., K.N., B.F.S. and E.A.R. Funds were  
356 provided by grants to J.R.R. from the National Science Foundation (EF-1241889, DEB-  
357 1518681), the National Institutes of Health (R01GM109499, R01TW010286-01), the US  
358 Department of Agriculture (2009-35102-0543), and the US Environmental Protection Agency  
359 (CAREER 83518801). Funding support was provided to D.J.C. and T.A.M. from the National  
360 Science Foundation (IOS-1755002 and ISO-1754862, respectively).



361 **References**

- 362 Bancroft, B. A., B. A. Han, C. L. Searle, L. M. Biga, D. H. Olson, L. B. Kats, J. J. Lawler, and  
363 A. R. Blaustein. 2011. Species-level correlates of susceptibility to the pathogenic  
364 amphibian fungus *Batrachochytrium dendrobatidis* in the United States. *Biodiversity and  
365 Conservation* **20**:1911-1920.
- 366 Berger, L., A. A. Roberts, J. Voyles, J. E. Longcore, K. A. Murray, and L. F. Skerratt. 2016.  
367 History and recent progress on chytridiomycosis in amphibians. *Fungal Ecology* **19**:89-  
368 99.
- 369 Berger, L., R. Speare, P. Daszak, D. E. Green, A. A. Cunningham, C. L. Goggin, R. Slocombe,  
370 M. A. Ragan, A. D. Hyatt, and K. R. McDonald. 1998. Chytridiomycosis causes  
371 amphibian mortality associated with population declines in the rain forests of Australia  
372 and Central America. *Proceedings of the National Academy of Sciences* **95**:9031-9036.
- 373 Blaustein, A., J. Urbina, P. Snyder, E. Reynolds, T. Dang, J. Hoverman, B. Han, D. Olson, C.  
374 Searle, and N. Hambalek. 2018. Effects of emerging infectious diseases on amphibians: a  
375 review of experimental studies. *Diversity* **10**:81.
- 376 Borenstein, M., L. V. Hedges, J. P. Higgins, and H. R. Rothstein. 2011. Introduction to meta-  
377 analysis. John Wiley & Sons.
- 378 Bosch, J., L. M. Carrascal, L. Duran, S. Walker, and M. C. Fisher. 2007. Climate change and  
379 outbreaks of amphibian chytridiomycosis in a montane area of Central Spain; is there a  
380 link? *Proceedings of the Royal Society B-Biological Sciences* **274**:253-260.
- 381 Brand, M. D., R. D. Hill, R. Brenes, J. C. Chaney, R. P. Wilkes, L. Grayfer, D. L. Miller, and M.  
382 J. Gray. 2016. Water temperature affects susceptibility to Ranavirus. *EcoHealth* **13**:350-  
383 359.

- 384 Breheny, P., and W. Burchett. 2013. Visualization of regression models using visreg. R  
385 package:1-15.
- 386 Carey, C., J. E. Bruzgul, L. J. Livo, M. L. Walling, K. A. Kuehl, B. F. Dixon, A. P. Pessier, R. A.  
387 Alford, and K. B. Rogers. 2006. Experimental exposures of boreal toads (*Bufo boreas*) to  
388 a pathogenic chytrid fungus (*Batrachochytrium dendrobatidis*). *EcoHealth* **3**:5-21.
- 389 Chung, Y., S. Rabe-Hesketh, V. Dorie, A. Gelman, and J. Liu. 2013. A nondegenerate penalized  
390 likelihood estimator for variance parameters in multilevel models. *Psychometrika* **78**:685-  
391 709.
- 392 Civitello, D. J., J. Cohen, H. Fatima, N. T. Halstead, J. Liriano, T. A. McMahon, C. N. Ortega, E.  
393 L. Sauer, T. Sehgal, S. Young, and J. R. Rohr. 2015. Biodiversity inhibits parasites:  
394 Broad evidence for the dilution effect. *Proceedings of the National Academy of Sciences*  
395 of the United States of America **112**:8667-8671.
- 396 Cohen, J., T. McMahon, C. Ramsay, E. A. Roznik, E. L. Sauer, S. Bessler, D. J. Civitello, B.  
397 Delius, N. Halstead, S. A. Knutie, K. Nguyen, N. Ortega, B. Sears, M. D. Venesky, S.  
398 Young, and J. R. Rohr. 2019a. Impacts of thermal mismatches on chytrid fungus  
399 *Batrachochytrium dendrobatidis* prevalence are moderated by life stage, body size,  
400 elevation and latitude. *Ecology letters* **22**:817-825.
- 401 Cohen, J. M., D. J. Civitello, M. D. Venesky, T. A. McMahon, and J. R. Rohr. 2019b. An  
402 interaction between climate change and infectious disease drove widespread amphibian  
403 declines. *Global change biology* **25**:927-937.
- 404 Cohen, J. M., M. D. Venesky, E. L. Sauer, D. J. Civitello, T. A. McMahon, E. A. Roznik, and J.  
405 R. Rohr. 2017. The thermal mismatch hypothesis explains host susceptibility to an  
406 emerging infectious disease. *Ecology letters* **20**:184-193.

- 407 Converse, S. J., L. L. Bailey, B. A. Mosher, W. C. Funk, B. D. Gerber, and E. Muths. 2017. A  
408 Model to Inform Management Actions as a Response to Chytridiomycosis-Associated  
409 Decline. *EcoHealth* **14**:144-155.
- 410 Cox, D. R. 2018. Analysis of binary data. Routledge.
- 411 Fisher, M. C., T. W. Garner, and S. F. Walker. 2009. Global emergence of *Batrachochytrium*  
412 dendrobatidis and amphibian chytridiomycosis in space, time, and host. *Annual review of*  
413 *microbiology* **63**:291-310.
- 414 Gervasi, S. S., P. R. Stephens, J. Hua, C. L. Searle, G. Y. Xie, J. Urbina, D. H. Olson, B. A.  
415 Bancroft, V. Weis, and J. I. Hammond. 2017. Linking ecology and epidemiology to  
416 understand predictors of multi-host responses to an emerging pathogen, the amphibian  
417 chytrid fungus. *PloS one* **12**:e0167882.
- 418 Goulson, D., E. Nicholls, C. Botías, and E. L. Rotheray. 2015. Bee declines driven by combined  
419 stress from parasites, pesticides, and lack of flowers. *Science* **347**:1255957.
- 420 Grogan, L. F., L. F. Skerratt, L. Berger, S. D. Cashins, R. D. Trengove, and J. P. Gummer. 2018.  
421 Chytridiomycosis causes catastrophic organism-wide metabolic dysregulation including  
422 profound failure of cellular energy pathways. *Scientific reports* **8**:8188.
- 423 Hairston, N. G. 1989. Ecological experiments: purpose, design and execution. Cambridge  
424 University Press.
- 425 IUCN. 2018. The IUCN Red List of Threatened Species. Version 2018.1.
- 426 Kriger, K. M., and J. M. Hero. 2007. Large-scale seasonal variation in the prevalence and  
427 severity of chytridiomycosis. *Journal of Zoology* **271**:352-359.
- 428 Lau, J., J. P. Ioannidis, N. Terrin, C. H. Schmid, and I. Olkin. 2006. Evidence based medicine:  
429 The case of the misleading funnel plot. *BMJ: British Medical Journal* **333**:597.

- 430 McMahon, T. A., and J. R. Rohr. 2015. Transition of chytrid fungus infection from mouthparts  
431 to hind limbs during amphibian metamorphosis. *EcoHealth* **12**:188-193.
- 432 O'Hanlon, S. J., A. Rieux, R. A. Farrer, G. M. Rosa, B. Waldman, A. Bataille, T. A. Kosch, K.  
433 A. Murray, B. Brankovics, and M. Fumagalli. 2018. Recent Asian origin of chytrid fungi  
434 causing global amphibian declines. *Science* **360**:621-627.
- 435 Paull, S. H., B. E. LaFonte, and P. T. J. Johnson. 2012. Temperature-driven shifts in a host-  
436 parasite interaction drive nonlinear changes in disease risk. *Global change biology*  
437 **18**:3558-3567.
- 438 Pessier, A. P., D. K. Nichols, J. E. Longcore, and M. S. Fuller. 1999. Cutaneous  
439 chytridiomycosis in poison dart frogs (*Dendrobates* spp.) and White's tree frogs (*Litoria*  
440 *caerulea*). *Journal of Veterinary Diagnostic Investigation* **11**:194-199.
- 441 Pounds, J. A., M. R. Bustamante, L. A. Coloma, J. A. Consuegra, M. P. L. Fogden, P. N. Foster,  
442 E. La Marca, K. L. Masters, A. Merino-Viteri, R. Puschendorf, S. R. Ron, G. A. Sanchez-  
443 Azofeifa, C. J. Still, and B. E. Young. 2006. Widespread amphibian extinctions from  
444 epidemic disease driven by global warming. *Nature* **439**:161-167.
- 445 Raffel, T. R., J. R. Rohr, J. M. Kiesecker, and P. J. Hudson. 2006. Negative effects of changing  
446 temperature on amphibian immunity under field conditions. *Functional Ecology* **20**:819-  
447 828.
- 448 Retallick, R. W. R., H. McCallum, and R. Speare. 2004. Endemic infection of the amphibian  
449 chytrid fungus in a frog community post-decline. *Plos Biology* **2**:1965-1971.
- 450 Rohr, J. R., D. J. Civitello, J. M. Cohen, E. A. Roznik, B. Sinervo, and A. I. Dell. 2018. The  
451 complex drivers of thermal acclimation and breadth in ectotherms. *Ecology letters*  
452 **21**:1425-1439.

- 453 Rohr, J. R., and T. R. Raffel. 2010. Linking global climate and temperature variability to  
454 widespread amphibian declines putatively caused by disease. *Proceedings of the National*  
455 *Academy of Sciences of the United States of America* **107**:8269-8274.
- 456 Rojas, S., K. Richards, J. K. Jancovich, and E. W. Davidson. 2005. Influence of temperature on  
457 Ranavirus infection in larval salamanders *Ambystoma tigrinum*. *Diseases of Aquatic*  
458 *Organisms* **63**:95-100.
- 459 Rollins-Smith, L. A. 1998. Metamorphosis and the amphibian immune system. *Immunological*  
460 *Reviews* **166**:221-230.
- 461 Sauer, E. L., R. C. Fuller, C. L. Richards-Zawacki, J. Sonn, J. H. Sperry, and J. R. Rohr. 2018.  
462 Variation in individual temperature preferences, not behavioural fever, affects  
463 susceptibility to chytridiomycosis in amphibians. *Proc. R. Soc. B* **285**:20181111.
- 464 Scheele, B. C., F. Pasmans, L. F. Skerratt, L. Berger, A. Martel, W. Beukema, A. A. Acevedo, P.  
465 A. Burrowes, T. Carvalho, A. Catenazzi, I. De la Riva, M. C. Fisher, S. V. Flechas, C. N.  
466 Foster, P. Frías-Álvarez, T. W. J. Garner, B. Gratwicke, J. M. Guayasamin, M.  
467 Hirschfeld, J. E. Kolby, T. A. Kosch, E. La Marca, D. B. Lindenmayer, K. R. Lips, A. V.  
468 Longo, R. Maneyro, C. A. McDonald, J. Mendelson, P. Palacios-Rodriguez, G. Parra-  
469 Olea, C. L. Richards-Zawacki, M.-O. Rödel, S. M. Rovito, C. Soto-Azat, L. F. Toledo, J.  
470 Voyles, C. Weldon, S. M. Whitfield, M. Wilkinson, K. R. Zamudio, and S. Canessa.  
471 2019. Amphibian fungal panzootic causes catastrophic and ongoing loss of biodiversity.  
472 *Science* **363**:1459-1463.
- 473 Skerratt, L. F., L. Berger, R. Speare, S. Cashins, K. R. McDonald, A. D. Phillott, H. B. Hines,  
474 and N. Kenyon. 2007. Spread of chytridiomycosis has caused the rapid global decline and  
475 extinction of frogs. *EcoHealth* **4**:125-134.

- 476 Stegen, G., F. Pasmans, B. R. Schmidt, L. O. Rouffaer, S. Van Praet, M. Schaub, S. Canessa, A.  
477 Laudelout, T. Kinet, and C. Adriaensen. 2017. Drivers of salamander extirpation  
478 mediated by *Batrachochytrium salamandrivorans*. *Nature* **544**:353.
- 479 Stevenson, L. A., E. A. Roznik, R. A. Alford, and D. A. Pike. 2014. Host-specific thermal  
480 profiles affect fitness of a widespread pathogen. *Ecology and Evolution* **4**:4053-4064.
- 481 Sweeting, M. J., A. J. Sutton, and P. C. Lambert. 2004. What to add to nothing? Use and  
482 avoidance of continuity corrections in meta-analysis of sparse data. *Statistics in Medicine*  
483 **23**:1351-1375.
- 484 Team, R. D. C. 2017. R: A language and environment for statistical computing. R Foundation for  
485 Statistical Computing, Vienna, Austria.
- 486 Venesky, M. D., T. R. Raffel, T. A. McMahon, and J. R. Rohr. 2014. Confronting  
487 inconsistencies in the amphibian-chytridiomycosis system: implications for disease  
488 management. *Biological Reviews* **89**:477-483.
- 489 Viechtbauer, W. 2010. Conducting meta-analyses in R with the metafor package. *Journal of*  
490 *Statistical Software* **36**:1-48.
- 491 Warne, R. W., E. J. Crespi, and J. L. Brunner. 2011. Escape from the pond: stress and  
492 developmental responses to ranavirus infection in wood frog tadpoles. *Functional*  
493 *Ecology* **25**:139-146.
- 494 Yates, F. 1934. Contingency tables involving small numbers and the  $\chi^2$  test. Supplement to the  
495 *Journal of the Royal Statistical Society* **1**:217-235.
- 496

497

Table 1| Results of a mixed-effects meta-analytic model of experiments relating mortality caused by *Batrachochytrium dendrobatidis* to factors including, temperature, life stage, dosage, and taxon. The main effect of Bd on mortality is indicated by the grand mean whereas the coefficient represents the pooled effect of Bd on mortality as a log odds ratio. For continuous variables, asterisks indicate a slope that deviates significantly from zero where the sign of the coefficient indicates the direction of the effect. For categorical variables (life stage and host taxa), asterisks indicate a significant difference from the grand mean with the coefficient indicating the direction and the difference from the grand mean.

|                      | Coefficient | SE    | z value | p value |   |
|----------------------|-------------|-------|---------|---------|---|
| Grand mean           | 1.559       | 0.314 | 4.964   | < 0.001 | * |
| LongTermTemp         | 0.288       | 0.133 | 2.164   | 0.031   | * |
| LabTemp              | 0.189       | 0.094 | 1.999   | 0.046   | * |
| LongTermTemp*LabTemp | -0.019      | 0.007 | -2.746  | 0.006   | * |
| Duration             | 0.009       | 0.004 | 2.159   | 0.031   | * |
| Larvae               | -0.947      | 0.228 | -3.983  | < 0.001 | * |
| Metamorph            | 0.924       | 0.195 | 4.740   | < 0.001 | * |
| Adult                | 0.023       | 0.266 | 0.087   | 0.931   |   |
| logDose              | 0.454       | 0.114 | 3.997   | < 0.001 | * |
| Bufoidea             | 1.690       | 0.657 | 2.573   | 0.010   | * |
| Hylaidea             | 1.093       | 0.601 | 1.817   | 0.069   |   |
| Ranaidea             | -0.218      | 0.628 | -0.347  | 0.729   |   |
| Salamandroidea       | -0.759      | 0.660 | -1.152  | 0.249   |   |

498

499 **Figure captions**

500

501 **Figure 1** | Distribution of (A) experimental temperatures, (B) *Batrachochytrium dendrobatidis*  
502 (Bd) zoospore doses, and (C) host life stages used in Bd-amphibian experiments for studies  
503 included in the mixed-effects meta-analysis of experiments relating mortality caused by Bd to  
504 experimental factors. (D) Map showing where hosts (blue points) and Bd isolates (red points)  
505 were collected from for studies included in the meta-analysis. All points on the map have the  
506 same opacity; locations where points appear darker indicate spatial overlap.

507

508 **Figure 2**| Partial residual plot for the effect of laboratory temperature on mortality of (A) cold-  
509 adapted (20th percentile long-term mean temperature, or climate:  $< 4.8^{\circ}\text{C}$ ) and (B) warm-adapted  
510 hosts (80th percentile long-term mean temperature:  $> 16.2^{\circ}\text{C}$ ) *Batrachochytrium dendrobatidis*  
511 (Bd)- exposed animals relative to controls (presented as an odds ratio) between 29 and 42 days  
512 after Bd exposure. The plot displays a significant two-way interaction between historic 50-year  
513 mean temperature at the collection location of the host and experimental laboratory temperature  
514 from a mixed-effects meta-analysis of experiments relating mortality caused by Bd to  
515 experimental factors. Positive values indicate greater mortality among Bd-exposed animals than  
516 among unexposed control animals. Points represent individual studies included in the meta-  
517 analysis and grey-shading shows associated 95% credible bands.

518

519 **Figure 3**| Partial residual plot showing the effect of *Batrachochytrium dendrobatidis* (Bd) dose  
520 ( $\log_{10}(\text{zoospores})$ ) on mortality of Bd-exposed animals relative to controls (presented as natural  
521 log odds ratio) on A) larvae, B) metamorphs, and C) adult hosts. Positive values indicate greater



522 mortality among Bd-exposed animals than among unexposed control animals. Points represent  
523 individual studies included in the mixed-effects meta-analysis of Bd-experiments and grey-  
524 shading shows associated 95% credible bands.

525

526 **Figure 4** | Forest plot of the marginal mean effect of *Batrachochytrium dendrobatidis* (Bd) on  
527 host mortality relative to controls of taxonomic groups (presented as natural log transformed  
528 odds ratio). Effect sizes are the result of a mixed-effects meta-analysis of experiments relating  
529 mortality caused by Bd to experimental factors. Positive values indicate greater mortality among  
530 Bd-exposed animals than among unexposed control animals. Asterisks indicate a significant  
531 difference from zero. Points represent the mean effect for that taxonomic group and error bars  
532 show associated 95% confidence interval

533

534

535 **Figures**  
536 **Figure 1**

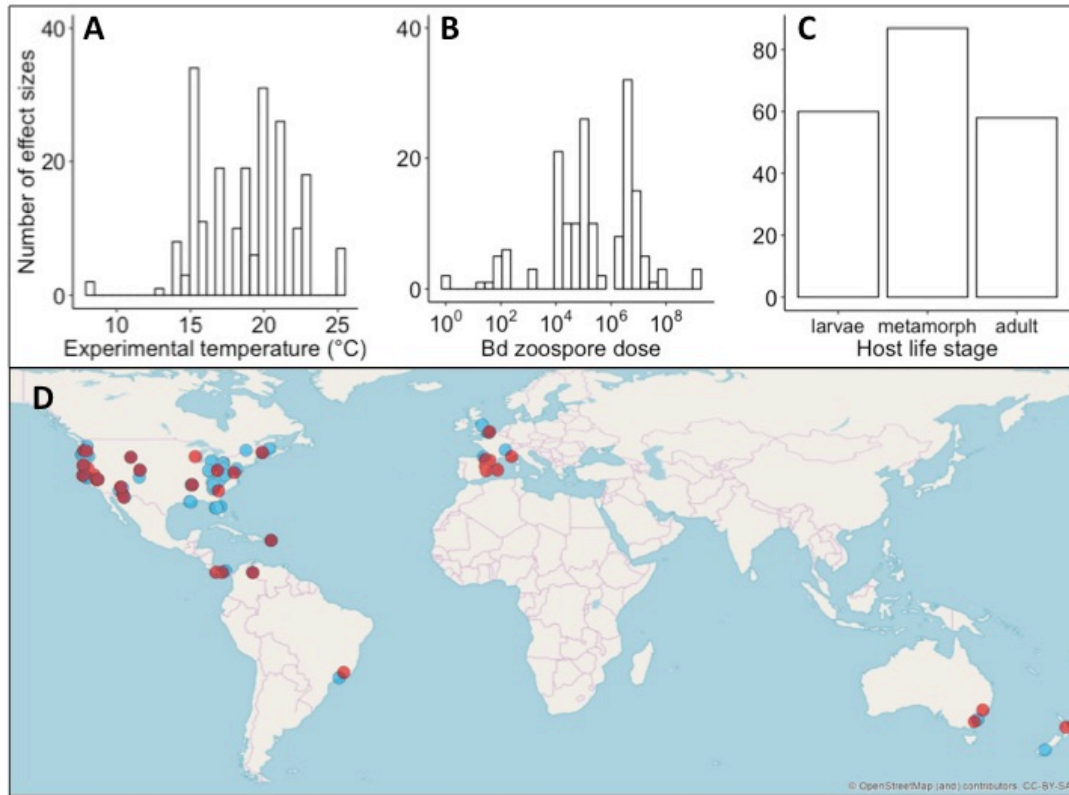

537  
538 **Figure 1** | Distribution of (A) experimental temperatures, (B) Bd zoospore doses, and (C) host  
539 life stages used in Bd-amphibian experiments for studies included in the meta-analysis. (D) Map  
540 showing where hosts (blue points) and Bd isolates (red points) were collected from for studies  
541 included in the meta-analysis. All points on the map have the same opacity; locations where  
542 points appear darker indicate spatial overlap.

543

544 **Figure 2**  
545

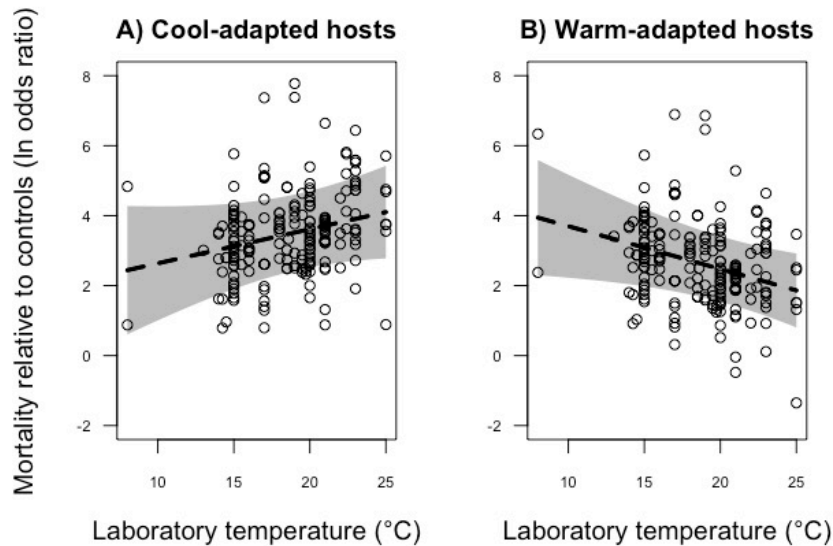

546  
547

548 **Figure 2** | Partial residual plot showing the predicted effect of laboratory temperature on  
549 mortality of (A) cold-adapted (20th percentile 50-year mean temperature, or climate: 4.8°C) and  
550 (B) warm-adapted hosts (80th percentile 50-year mean temperature: 16.2°C) relative to control  
551 animals (presented as an odds ratio on the y-axis) between 29 and 42 days after Bd exposure.

552 The plot displays the significant two-way interaction between historic 50-year mean temperature  
553 at the collection location of the host and experimental laboratory temperature. Positive values  
554 indicate greater mortality among Bd-exposed animals than among unexposed control animals.

555 Points represent individual studies included in the meta-analysis and grey-shading shows  
556 associated 95% credible bands.

557 **Figure 3**

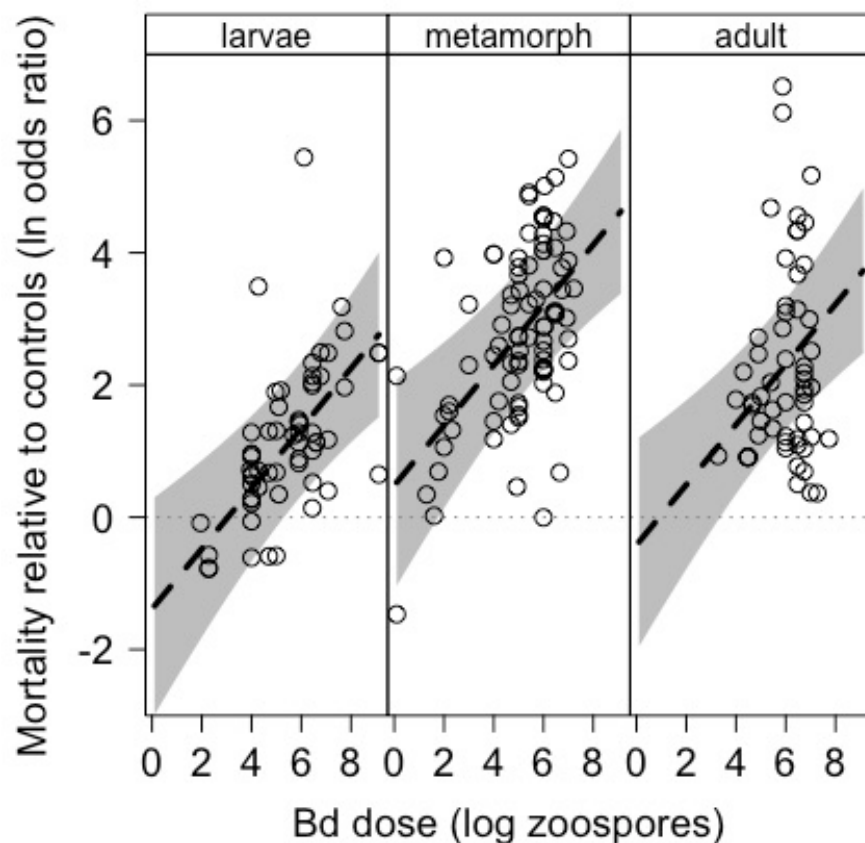

558  
559

560 **Figure 3** | Partial residual plot showing the effect of Bd dose ( $\log_{10}(\text{zoospores})$ ) on mortality of  
561 Bd-exposed animals relative to controls (presented as natural log odds ratio) on A) larvae, B)  
562 metamorphs, and C) adult hosts. Positive values indicate greater mortality among Bd-exposed  
563 animals than among unexposed control animals. Points represent individual studies included in  
564 the meta-analysis and grey-shading shows associated 95% credible bands.

565

566 Figure 4

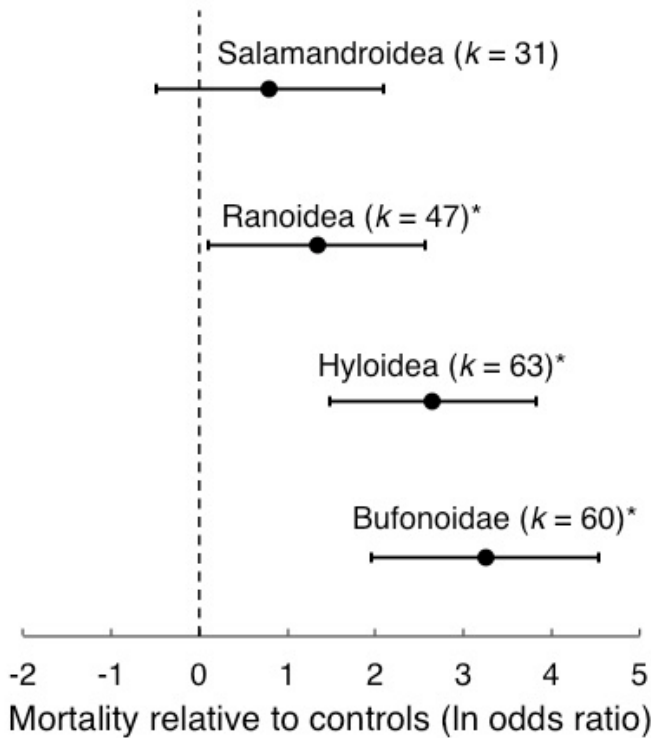

567

568 **Figure 4** | Forest plot of the marginal mean effect of Bd on host mortality relative to controls of

569 taxonomic groups (presented as natural log transformed odds ratio). Positive values indicate

570 greater mortality among Bd-exposed animals than among unexposed control animals. Asterisks

571 indicate a significant difference from zero. Points represent the mean effect for that taxonomic

572 group and error bars show associated 95% confidence intervals.

573
